# Supplementary material
Source: PubMed Central journal article supplement (PMC4034239)
Supplement: 1401662111_pnas.201401662SI.pdf [file 1401662111_pnas.201401662SI.pdf]

# Supporting Information

Osokine et al. 10.1073/pnas.1401662111

## SI Materials and Methods

**Isolation of Peripheral Organ and Intestinal Lymphocytes.** Lymphocytes from spleen, inguinal, brachial/axillary, and mesenteric lymph nodes were isolated by mashing the organ through a 100- $\mu$ m filter. For experiments in which intrahepatic or intestinal lymphocytes were analyzed, mice were perfused with 25 mL of sterile PBS by intracardiac injection to remove blood from peripheral tissues. Intrahepatic lymphocytes were isolated by mashing the respective organ through a 100- $\mu$ m filter and by subsequent centrifugation in 35% (vol/vol) Percoll (GE Healthcare).

To obtain intestinal lymphocytes, the gut was first resected and flushed with D10 medium to remove digestive matter. Subsequently, the gut was divided into small and large intestine, minced, digested with DTT (1 mM in medium; Thermo Scientific), and filtered to isolate intraepithelial lymphocytes (IELs). To obtain lamina propria lymphocytes (LPLs), the undigested fraction was further digested with collagenase and DNase I (0.5 mg/mL in medium; Roche) and filtered a second time. The 40/80% (vol/vol) Percoll gradient centrifugation was used to separate IELs and LPLs from intestinal debris.

**In Vivo Dendritic Cell Depletion.** To deplete dendritic cells, CD11c-DTR mice were treated i.v. with 100 ng of diphtheria toxin in PBS (List Biological Laboratories) 1 d before SMARTA cell transfer. A second treatment was given 1 d after cell transfer. PBS vehicle was injected into undepleted controls.

**RNA Microarray and Quantitative RT-PCR.** A total of 5,000 SMARTA cells was transferred into naïve mice that were immediately infected with lymphocytic choriomeningitis virus (LCMV)-C13 (early priming) or mice infected with LCMV-C113 21 d earlier (late priming). Samples contained cells isolated from the spleens of six pooled mice per group. Eight days after SMARTA transfer, early- and late-primed SMARTA cells were isolated by FACS sorting using an Aria II (Becton Dickinson). Postsort purity was verified as >97% on the FACSVerse (Becton Dickinson). RNA was isolated from the sorted cells using the RNeasy extraction kit (Qiagen). RNAs were evaluated using an Agilent Bioanalyzer, labeled using the Ambion WT labeling kit, and hybridized to the Affymetrix Mouse Genes ST1.0 microarrays, which were scanned and summarized using Affymetrix Expression Console and RMA16. Analysis of specific Th1 and Tfh gene products was based in part on Hale et al. (1).

For quantitative RT-PCR, RNA was prepared from sorted early- and late-primed cells, or from peripheral blood mononuclear cells. Three to four biological replicates were obtained per group. RNA was normalized for input and amplified directly using the One-Step RT-PCR kit (Qiagen). PRDM1, GRAIL, MX1, OAS, and HPRT were amplified using Applied Biosystems

Assays-on-Demand TaqMan premade expression assays. mRNA amplification was detected on the iCycler (Bio-Rad Laboratories). RNA expression was normalized to HPRT.

**ELISA.** To quantify LCMV-specific antibodies, LCMV-M2 was used to coat 96-well Maxisorp ELISA plates (Nunc) overnight. Plates were blocked with 3% (wt/vol) BSA/PBS/0.05% Tween 20. Subsequently, serum isolated from the indicated mice was incubated on the LCMV-coated plates. Plates were washed and incubated with an HRP-labeled goat anti-mouse IgG antibody (Invitrogen), followed by the addition of *o*-phenylenediamine substrate in 0.05 M phosphate citrate buffer. The reaction was stopped with 1 M H<sub>2</sub>SO<sub>4</sub>, and the optical density values were read using an ELISA plate reader (Synergy 2; BioTek) at 490 nm. The concentration of antibody bound to plated virus was interpolated from a standard curve. The standard curve was generated from a serial dilution of purified mouse IgG (Invitrogen; 500–0.49 ng/mL) incubated on plates coated with goat anti-mouse IgG (Invitrogen).

**KL25 Hybridoma Preparation and Neutralization Assays.** KL25 B-cell hybridomas were generated by isolating KL25<sup>+</sup> B cells from TgKL25 mice. Binding of the purified KL25 antibody to LCMV-M1 and LCMV-M2 but not LCMV-C113 was confirmed by ELISA using plates coated with each individual virus. To determine KL25 neutralization activity against LCMV-C113, LCMV-M1, and LCMV-M2, each virus was individually preincubated with serial dilutions of KL25 antibody for 30 min and plaque assay performed on Vero cells. Assays were performed in triplicate.

**Flow Cytometry.** Analysis of immune subsets was performed by staining lymphocytes obtained from spleen, lymph nodes, liver, and intestinal fractions *ex vivo* for the expression of CD4, CD8, signaling lymphocytic activation molecule (SLAMF), CD122 (IL-2R $\beta$ ), CD25 (IL-2R $\alpha$ ), CD62L, IFN- $\gamma$ , TNF- $\alpha$ , CD138, CD11c, MHCII (I-A/I-E), CD86 (B7.2) (BioLegend); CD45.1, Granzyme B (eBioscience); and Thy1.1, B-cell lymphoma 6 (Bcl6), and Tbet (BD Biosciences). C-X-C chemokine receptor type 5 (CXCR5) expression was assessed by staining with anti-CXCR5-biotin (BD Biosciences), followed by SA-BV (BioLegend). IL-21 cytokine expression was assessed by staining with a recombinant mouse IL-21R subunit/FC chimera (R&D Systems), followed by anti-Fc-PE (Jackson Immune Research). LCMV-specific KL25<sup>+</sup> B cells were identified using antibodies against the heavy chain (clone IIIC) and idiotype (clone B2.5). Carboxyfluorescein succinimidyl ester (CFSE) dilution analysis was performed by incubating naïve SMARTA cells with 2.5  $\mu$ M CFSE (Life Technologies). Flow-cytometric data were collected on the FACSVerse (Becton Dickinson).

1. Hale JS, et al. (2013) Distinct memory CD4<sup>+</sup> T cells with commitment to T follicular helper- and T helper 1-cell lineages are generated after acute viral infection. *Immunity* 38(4):805–817.

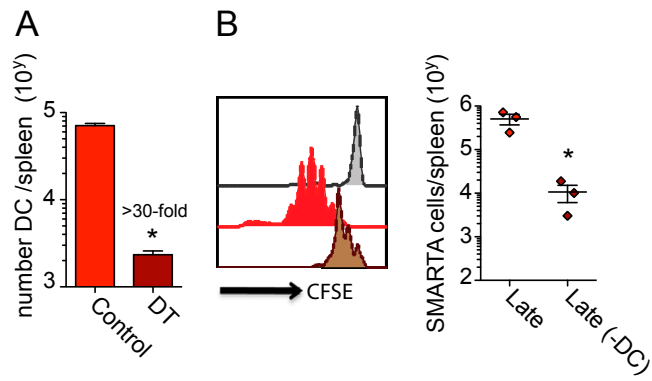

**Fig. S1.** Dendritic cells mediate priming during an established persistent viral infection. (A) On day 20 after infection, CD11c-DTR transgenic mice were treated with PBS or diphtheria toxin (DT) to deplete dendritic cells, and CFSE-labeled naïve SMARTA cells were transferred 24 h later. Twenty-four hours after transfer, mice were again given DT or PBS. Mice were killed 60 h after transfer. The graph indicates the number of CD11c<sup>+</sup>, MHCII<sup>hi</sup> dendritic cells in the spleen of PBS- or DT-treated mice 36 h after final treatment. Red, PBS control; brown, DT treatment. (B) The flow plots demonstrate CFSE dilution and the graph indicates the number of SMARTA cells 60 h after transfer in the spleen in PBS (red)- or DT (brown)-treated mice. Gray, SMARTA cells transferred into naïve mice not subsequently infected with LCMV. \* $P < 0.05$ ; ns, not significant. Data are representative of two independent experiments with three to four mice per group.





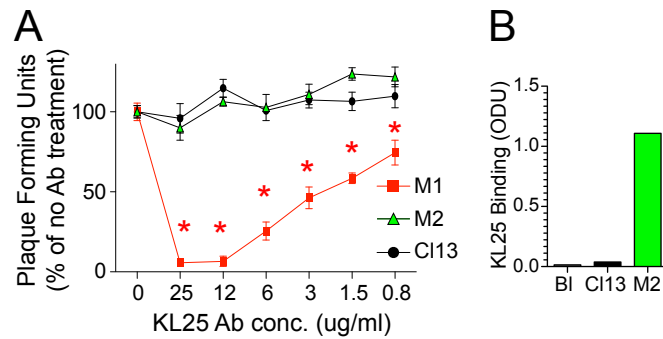

**Fig. 55.** Binding and neutralization of LCMV isolates by KL25 antibody. (A) Neutralization of LCMV-CI13 (black), LCMV-M1 (red), and LCMV-M2 (green) by the KL25 antibody. The graphs demonstrate the number of viral plaques as a percentage of no antibody control. (B) A fixed concentration of KL25 antibody was coincubated with media alone (blank), with  $2 \times 10^6$  plaque-forming units of LCMV-CI13, or with  $2 \times 10^6$  plaque-forming units of LCMV-M2. Antibody binding was determined by ELISA and is displayed as optical density units (ODU). \* $P < 0.05$ . Data are representative of two independent experiments.

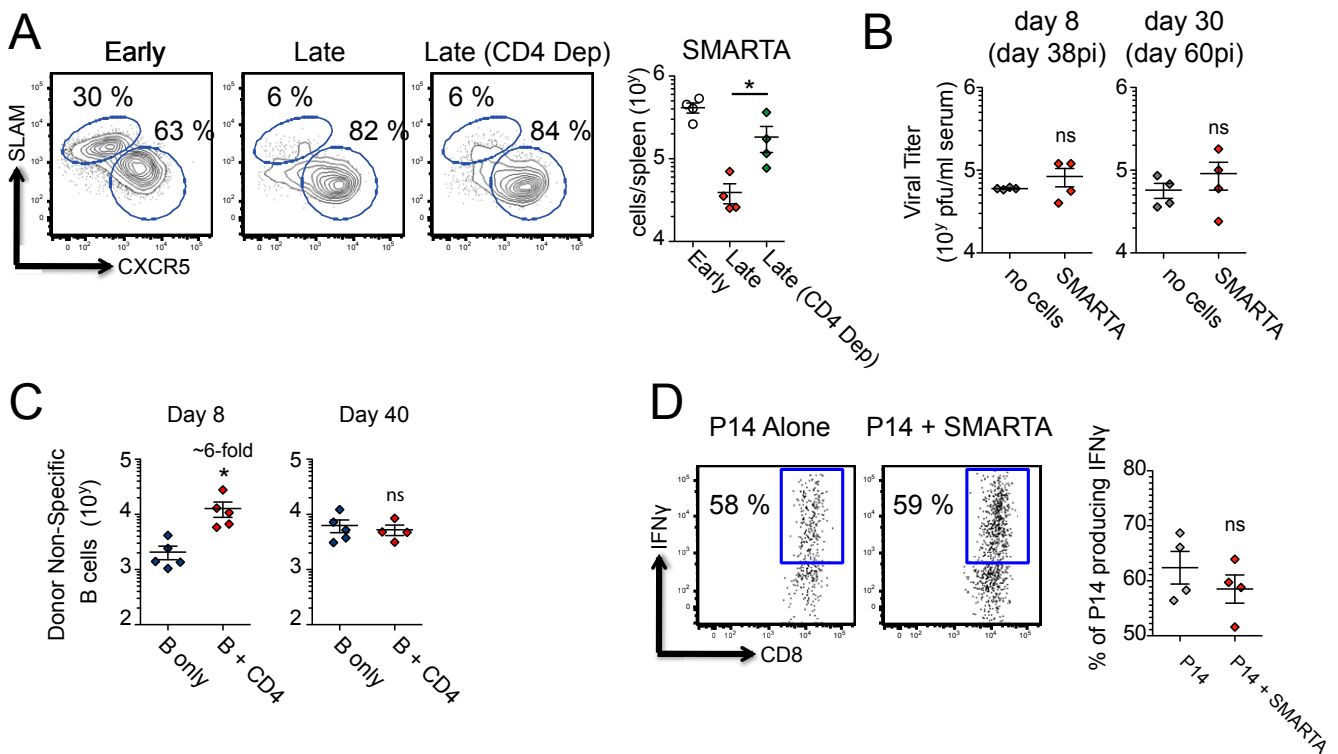

**Fig. 56.** Preexisting antiviral CD4 T-cell responses do not affect the late-primed Th1 defect, and the late-primed CD4 T cells do not provide enhanced help to non-LCMV-specific B cells or LCMV-specific T cells. (A) Th1 and Tfh generation in early- and late-primed cohorts and in a cohort of mice that were CD4 depleted before infection with LCMV-CI13 and received SMARTA cells 30 d after infection. The flow plots and graphs illustrate the percentage of Th1 and Tfh SMARTA cells and the number of SMARTA cells within the spleen 8 d after transfer. (B) Mice were CD4 depleted before LCMV infection. Thirty days after infection, mice received either SMARTA cells or no cells, and plasma virus titers were quantified on days 8 and 30 after transfer (38 and 60 d after infection). (C) Non-LCMV-specific, splenic donor B cells from TgKL25 mice (i.e., heavy chain positive, anti-idiotypic antibody staining negative) were quantified numerically on days 8 and 40 after cell transfer. (D) The flow plots and graph illustrate IFN- $\gamma$  secretion by virus-specific P14 cells 8 d after transfer alone or with SMARTA cells. Transfer was performed into persistently infected mice that were CD4 depleted before infection. \* $P < 0.05$ ; ns, not significant. Data are representative of four independent experiments with three to four mice per group.

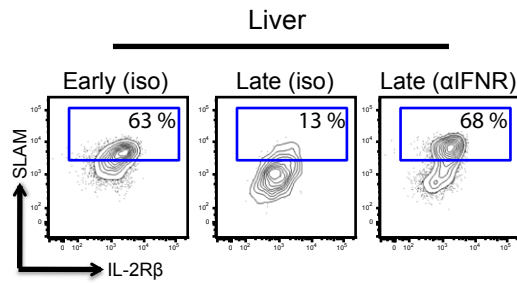

**Fig. S7.** IFN $\gamma$  blockade restores Th1 formation within the liver. The flow plots illustrate Th1 (SLAM<sup>hi</sup>, IL-2R $\beta$ <sup>hi</sup>) formation in liver SMARTA cells 8 d after early or late priming and isotype treatment (iso) or anti-IFN $\gamma$  blocking antibody treatment. Data are representative of four independent experiments with three to four mice per group.

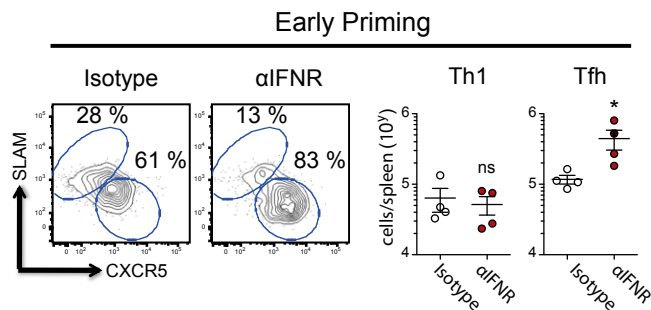

**Fig. S8.** IFN $\gamma$  blockade at the onset of persistent infection leads to enhanced Tfh but not Th1 formation. The flow plots and graphs illustrate Th1 and Tfh formation by splenic SMARTA cells 9 d after isotype or anti-IFN $\gamma$  blocking antibody treatment at the onset of infection. \* $P < 0.05$ ; ns, not significant. Data are representative of four independent experiments with three to four mice per group.

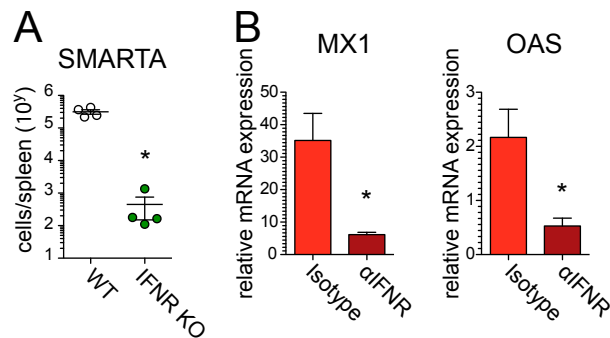

**Fig. S9.** IFN-I signaling during is required for early-primed virus-specific CD4 T-cell survival, and anti-IFN $\gamma$  blockade suppresses IFN-I signaling within 24 h of treatment. (A) WT or IFN $\gamma$ <sup>-/-</sup> SMARTA cells were transferred into mice immediately before LCMV-Cl13 infection. The graph shows the number of splenic SMARTA cells 8 d after infection. (B) On day 21 after LCMV-Cl13 infection, mice were treated with isotype or anti-IFN $\gamma$  blocking antibody. The graphs display mRNA expression of IFN-inducible genes MX1 and OAS in peripheral blood mononuclear cells 24 h after treatment. \* $P < 0.05$ . Data are representative of two independent experiments with four mice per group.
